# Supplementary material for: Mass Spectrometry Based Profiling and Imaging of Various Ginsenosides from Panax ginseng Roots at Different Ages
Source: MDPI journal article supplement (doi:10.3390/ijms18061114), 2017-05-24
Supplement: s1 [file s1]

## Supplementary File:

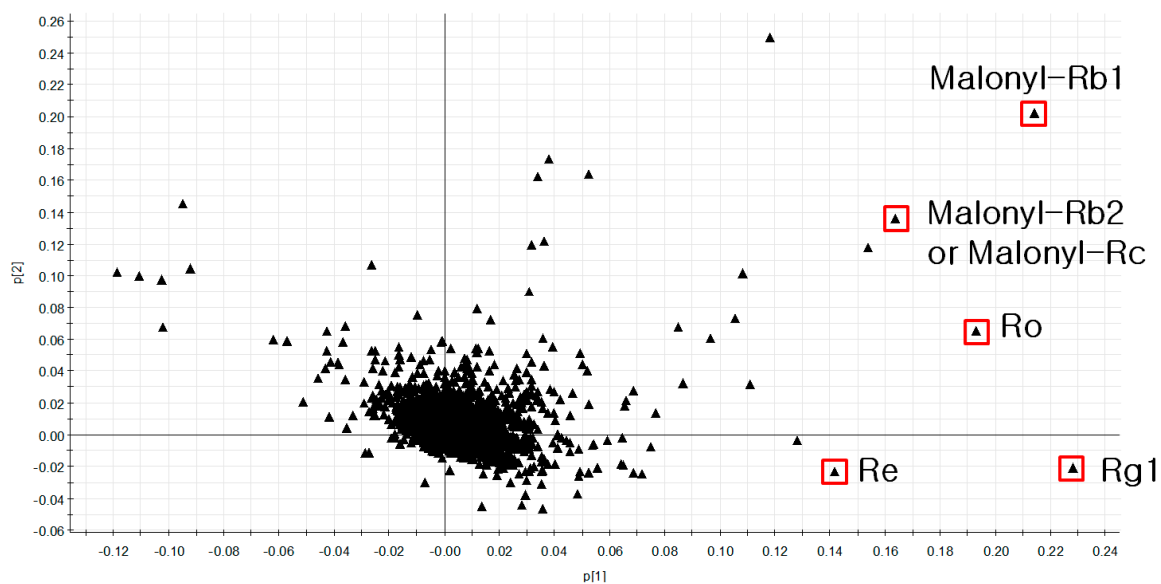

**Figure S1.** Principal component analysis loading plot of ginsenoside extracts from the ginseng roots, cultivated for 4, 5, and 6 years. Several points, the main variables having  $m/z$ \_RT pairs, were identified as follows:  $m/z$  845.489\_5.38 (Rg1),  $m/z$  955.489\_15.82 (Ro),  $m/z$  991.546\_5.69 (Re),  $m/z$  1193.594\_15.35 (malonyl-Rb1), and  $m/z$  1163.583\_17.23 (malonyl-Rb2 or malonyl-Rc).

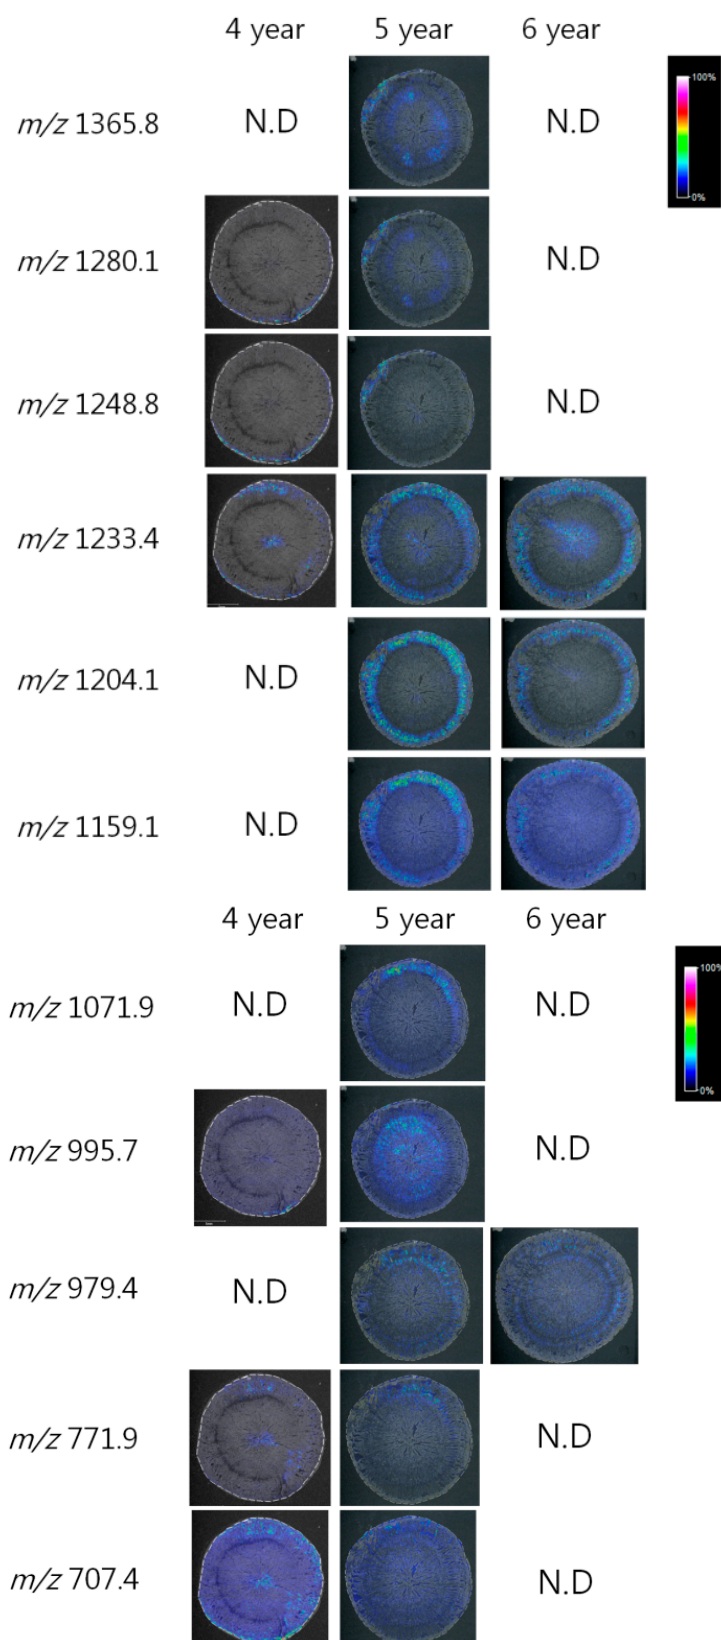

**Figure S2.** MALDI-MSI cross sections showing the localization of unknown ions having different  $m/z$  values ( $m/z$  1365.8,  $m/z$  1280.1,  $m/z$  1248.8,  $m/z$  1233.4,  $m/z$  1204.1,  $m/z$  1159.1,  $m/z$  1071.9,  $m/z$  995.7,  $m/z$  979.4,  $m/z$  771.9,  $m/z$  707.4) from ginseng roots cultivated for 4, 5, and 6 years.
